# Supplementary material
Source: Royal Society of Chemistry journal article supplement (doi:10.1039/d6ay00400h)
Supplement: d6ay00400h1.pdf [file d6ay00400h1.pdf]

## Rapid and targeted HILIC-MS/MS quantification of urinary metabolites reveals metabolic alterations in COVID-19 patients

Ondrej Hodek<sup>1,2</sup>, Anna Edman<sup>1,2</sup>, Christoffer Granvik<sup>3</sup>, Alicia Lind<sup>4,5</sup>, Anna K. Överby<sup>3,4</sup>, Mareike Gutensohn<sup>2,6</sup>, Annika I. Johansson<sup>2,6</sup>

<sup>1</sup>Department of Forest Genetics and Plant Physiology, Swedish University of Agricultural Sciences, Umeå, Sweden

<sup>2</sup>Swedish Metabolomics Centre, Umeå, Sweden

<sup>3</sup>Department of Clinical Microbiology, Umeå University, Umeå, Sweden

<sup>4</sup>The Laboratory for Molecular Medicine Sweden (MIMS), Umeå University, Sweden

<sup>5</sup>Department of Diagnostics and Intervention, Umeå University, Umeå, Sweden \* Ondrej Hodek

<sup>6</sup>Department of Plant Physiology, Umeå University, Umeå, Sweden

ondrej.hodek@slu.se

### Supplementary information

**Table S1** Optimized MRM transitions for urinary metabolites with retention time values acquired under optimized conditions on the BEH amide column.

| Analyte              | Precursor | Product | Collision energy [V] | Quant / qual | Ionization | Retention time [min] |
|----------------------|-----------|---------|----------------------|--------------|------------|----------------------|
| urea                 | 61        | 44      | 30                   | quant        | +          | 0.38                 |
| creatinine           | 114       | 86      | 10                   | quant        | +          | 0.49                 |
|                      |           | 44      | 18                   | qual         |            |                      |
| <i>tele</i> -MIAA    | 141       | 95      | 14                   | quant        | +          | 1.62                 |
|                      |           | 42      | 54                   | qual         |            |                      |
| uric acid            | 167       | 124     | 14                   | quant        | -          | 1.73                 |
|                      |           | 42      | 60                   | qual         |            |                      |
| 1-methylhistamine    | 126       | 109     | 14                   | quant        | +          | 1.74                 |
|                      |           | 68      | 20                   | qual         |            |                      |
| <i>pi</i> -MIAA      | 141       | 95      | 30                   | quant        | +          | 2.22                 |
|                      |           | 42      | 54                   | qual         |            |                      |
| creatine             | 132       | 90      | 16                   | quant        | +          | 2.31                 |
|                      |           | 44      | 20                   | qual         |            |                      |
| guanidinoacetic acid | 118       | 76      | 15                   | quant        | +          | 2.34                 |
|                      |           | 72      | 20                   | qual         |            |                      |
| 1-methylhistidine    | 170       | 124     | 14                   | quant        | +          | 2.44                 |
|                      |           | 83      | 30                   | qual         |            |                      |
| 3-methylhistidine    | 170       | 96      | 29                   | quant        | +          | 2.57                 |
|                      |           | 109     | 20                   | qual         |            |                      |

|                                             |     |     |    |       |   |      |
|---------------------------------------------|-----|-----|----|-------|---|------|
| <b>urea-<sup>15</sup>N<sub>2</sub></b>      | 63  | 45  | 30 | quant | + |      |
| <b>creatinine-D<sub>3</sub></b>             | 117 | 89  | 10 | quant | + | 0.49 |
| <b>uric acid-<sup>15</sup>N<sub>2</sub></b> | 169 | 125 | 14 | quant | - | 1.69 |
| <b>1-methylhistamine-D<sub>3</sub></b>      | 129 | 112 | 14 | quant | + | 1.77 |
| <b>creatine-D<sub>3</sub></b>               | 135 | 93  | 16 | quant | + | 2.31 |
| <b>1-methylhistidine-D<sub>3</sub></b>      | 173 | 127 | 14 | quant | + | 2.44 |
| <b>3-methylhistidine-D<sub>3</sub></b>      | 173 | 99  | 20 | quant | + | 2.57 |

**Table S2** Validation parameters for urinary metabolites on the BEH amide column

| Analyte              | Internal standard                       | LOD [nM] | LOQ [nM] | Linear calibration range [nM] | Response function | $R^2$  | Weight | Carry-over [%] |
|----------------------|-----------------------------------------|----------|----------|-------------------------------|-------------------|--------|--------|----------------|
| urea                 | urea- <sup>15</sup> N <sub>2</sub>      | 70       | 200      | 300 - 100000                  | linear            | 0.9953 | 1/x    | 0              |
| creatinine           | creatinine-D <sub>3</sub>               | 0.1      | 0.7      | 10 – 100000                   | linear            | 0.9982 | 1/x    | 0              |
| <i>tele</i> -MIAA    | N/A                                     | 0.3      | 1        | 1 – 20000                     | power             | 0.9710 | 1/x    | 0.006          |
| uric acid            | uric acid- <sup>15</sup> N <sub>2</sub> | 200      | 500      | 300 – 10000                   | linear            | 0.9615 | 1/x    | 0              |
| 1-methylhistamine    | 1-methylhistamine-D <sub>3</sub>        | 3        | 10       | 10 – 100000                   | power             | 0.9967 | 1/x    | 0.025          |
| <i>pi</i> -MIAA      | N/A                                     | 0.3      | 1        | 1 – 20000                     | power             | 0.9648 | 1/x    | 0.0066         |
| creatine             | creatine-D <sub>3</sub>                 | 3        | 10       | 10 – 100000                   | linear            | 0.9966 | 1/x    | 0.0079         |
| guanidinoacetic acid | N/A                                     | 30       | 100      | 50 – 50000                    | linear            | 0.9981 | 1/x    | 0              |
| 1-methylhistidine    | 1-methylhistidine-D <sub>3</sub>        | 1        | 5        | 10 – 100000                   | linear            | 0.9954 | 1/x    | 0.15           |
| 3-methylhistidine    | 3-methylhistidine-D <sub>3</sub>        | 1        | 10       | 10 – 100000                   | linear            | 0.9981 | 1/x    | 0.22           |

 $R^2$  – coefficient of determination

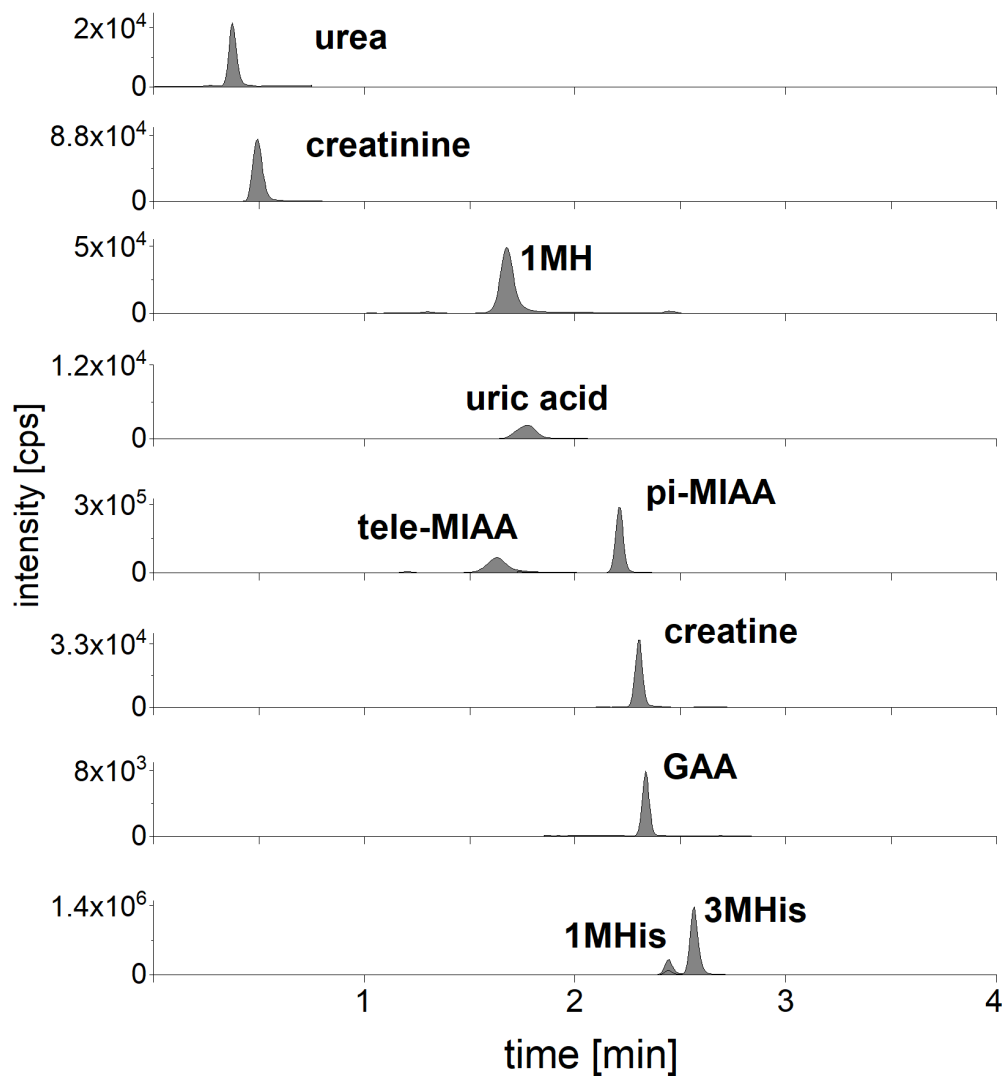

**Figure S1** Extracted ion chromatograms obtained from measurements of 150x diluted urine (1MH, tele.MIAA, pi-MIAA, creatine, GAA, 1MHis, 3MHis) and 6000x diluted urine (creatinine, urea, uric acid)
